# Supplementary material for: Prognostic implications of impaired longitudinal left ventricular systolic function assessed by tissue Doppler imaging prior to transcatheter aortic valve implantation for severe aortic stenosis
Source: Int J Cardiovasc Imaging. 2022 Jan 10;38(6):1317–28. doi: 10.1007/s10554-021-02519-2 (PMC11142981; doi:10.1007/s10554-021-02519-2)
Supplement: Supplementary file 1 — Supplementary file1 (docx 19 KB) [file 10554_2021_2519_MOESM1_ESM.docx]

**SUPPLEMENTARY APPENDIX**

**PROGNOSTIC IMPLICATIONS OF IMPAIRED LONGITUDINAL LEFT VENTRICULAR SYSTOLIC FUNCTION ASSESSED BY TISSUE DOPPLER IMAGING PRIOR TO TRANSCATHETER AORTIC VALVE IMPLANTATION FOR SEVERE AORTIC STENOSIS**

Guglielmo Gallone MD1, Francesco Bruno MD1, Teresa Trenkwalder, MD2, Fabrizio D'Ascenzo MDPhD1, Fabian Islas MD3, Pier Pasquale Leone MD4, Philipp Nicol, MD2, Costanza Pellegrini, MD2, Enrico Incaminato1, Pilar Jimenez-Quevedo MD3, Hector Alfonso Alvarez-Covarrubias, MD2, Renato Bragato MD4, Alessandro Andreis MD1, Stefano Salizzoni MD1, Mauro Rinaldi MD, Prof1, Adnan Kastrati, MD, Prof2, Federico Conrotto MD1, Michael Joner MD, Prof2, Giulio Stefanini MD, Prof4, Luis Nombela-Franco MD3, Erion Xhepa MD, PhD2, Javier Escaned MD, Prof3, Gaetano M. De Ferrari MD, Prof1

1. Division of Cardiology, Department of Medical Sciences, , Città della Salute e della Scienza, University of Turin, Turin, Italy
2. Deutsches Herzzentrum München, Munich, Germany
3. Hospital Clínico San Carlos, IDISSC, and Universidad Complutense de Madrid, Madrid, Spain
4. Humanitas Clinical and Research Center IRCCS, Rozzano-Milan, Italy

**Corresponding author**:

Guglielmo Gallone, MD

Division of Cardiology, Città della Salute e della Scienza, Torino, Italy

Corso Bramante 88/90, 10126, Turin, Italy

Email: guglielmo.gallone@gmail.com Phone: +390116335443

1. **Study collaborators**

Filippo Angelini MD1, Pier Paolo Bocchino MD1, Francesco Piroli MD1, Giulia De Lio MD1, Francesca De Lio MD1, Andrea Angelini MD1, Luca Scudeler MD1, Chiara Bongiovanni1, Matteo D’Amica1, Ovidio De Filippo MD1

1. Cardiovascular and Thoracic Department, Città della Salute e della Scienza, Turin, and Department of Medical Sciences, University of Turin, Turin, Italy

**Supplementary Figure 1. Procedural outcomes according to average S’ status**

|  | **Average S'**  **<6.5 cm/s  (n=164)** | **Average S'**  **≥6.5 cm/s**  **(n=133)** | **P-value** |
| --- | --- | --- | --- |
|  | PERIPROCEDURAL OUTCOMES | | |
| **Valve Embolization (%)** | 0 (0) | 0(0) | 1.000 |
| **Second valve Implanted (%)** | 1 (1.1) | 0 (0) | 0.535 |
| **Annular Rupture (%)** | 1 (0.8) | 0 (0) | 0.551 |
| **Aortic dissection (%)** | 0 (0) | 0 (0) | 1.000 |
| **Pericardial Tamponade (%)** | 2 (1.2) | 1 (0.8) | 0.581 |
| **Coronary Occlusion (%)** | 1 (0.6) | 0 (0) | 0.554 |
| **Conversion to open heart surgery (%)** | 1 (0.6) | 1 (0.8) | 0.691 |
